# Supplementary material
Source: MDPI journal article supplement (https://www.mdpi.com/2311-7524/9/3/401)
Supplement: s1 [file s1]

# Farmers' Intention to Adopt Agronomic Biofortification: The Case of Iodine Biofortified Vegetables in Uganda

Table S1: Constructs used in the study

| Constructs and statements used in the study                                                                                         | Operational definition                                                                                         |
|-------------------------------------------------------------------------------------------------------------------------------------|----------------------------------------------------------------------------------------------------------------|
| <b>Attitude</b>                                                                                                                     |                                                                                                                |
| ATT1: Applying iodine fertilizer to my vegetable garden would improve the nutrition of my family members                            | The farmer's positive or negative evaluation of agronomic iodine biofortification                              |
| ATT2: I consider the application of iodine fertilizers to vegetables to be unethical (R)                                            |                                                                                                                |
| ATT3: Applying iodine fertilizers to my vegetable garden would contribute to increased yield                                        |                                                                                                                |
| ATT4: Applying iodine fertilizers to vegetables would be expensive (R)                                                              |                                                                                                                |
| ATT5: Applying iodine fertilizers to cabbage would be a safe                                                                        |                                                                                                                |
| <b>Subjective norms</b>                                                                                                             |                                                                                                                |
| SN1: My family members would support that I apply iodine fertilizers to my vegetable garden                                         | Farmers' belief that significant others can influence their perception regarding iodine fertilizers            |
| SN2: Most people who buy my vegetables would approve the application of iodine fertilizers                                          |                                                                                                                |
| SN3: Members of my household would disapprove of me applying iodine fertilizers                                                     |                                                                                                                |
| SN4: I would apply iodine fertilizers to my vegetable garden even if other farmers in my locality didn't accept to do so            |                                                                                                                |
| <b>Perceived behavioral Control</b>                                                                                                 |                                                                                                                |
| PBC1: Applying iodine fertilizers may be difficult, even if I wanted (R)                                                            | The farmers' belief and confidence that the decision to use iodine fertilizers is under his volitional Control |
| PBC2: The decision to apply iodine fertilizers to my cabbage is beyond my Control (R)                                               |                                                                                                                |
| PBC3: I am confident that I could apply iodine fertilizers to my vegetable garden if I wanted to                                    |                                                                                                                |
| PBC4: I have adequate skills and knowledge of fertilizer application which would allow me to apply iodine fertilizers to vegetables |                                                                                                                |
| PBC5: The decision to apply iodine fertilizer to my cabbage is entirely up to me                                                    |                                                                                                                |
| <b>Perceived susceptibility</b>                                                                                                     |                                                                                                                |
| Psus1: The elderly in my family and community are susceptible to IDD                                                                | The farmer's subjective perception of their (including family members) risk of acquiring IDD                   |
| Psus2: Children are likely to suffer and perform poorly at school because of iodine deficiency                                      |                                                                                                                |
| Psus3: Children are susceptible to IDD                                                                                              |                                                                                                                |
| Psus4: What I eat makes it likely that I could develop IDDs                                                                         |                                                                                                                |
| Psus5: I feel that my chances of getting iodine deficiency disorders in the future are high if I don't eat iodine-rich foods        |                                                                                                                |
| <b>Perceived Severity</b>                                                                                                           |                                                                                                                |
| Psev1: It is possible that our children are retarded and perform poorly due to iodine deficiency                                    | The farmer's feelings concerning the seriousness of Iodine deficiency                                          |
| Psev2: I think IDDS is a severe health problem and could lead to long-standing problems                                             |                                                                                                                |

---

Psev4: If my children suffer from iodine deficiency disorders, it would have a severe, negative influence on their performance at school and at work

Psev5: If I get IDD, it would have a severe negative consequence on my quality of life

**Perceived barriers**

PBar1: Iodine-rich vegetables may be expensive (R)

PBar2: I am afraid that iodine fertilizers will affect the taste of the vegetables (R)

PBar3: I am afraid incorporating iodine-rich vegetables would require starting a new habit, which is difficult for me (R)

The farmers' Beliefs concerning costs or negative aspects of applying iodine fertilizers/consuming iodine-rich vegetables.

**Perceived Benefits**

PBen1: I believe that consuming iodine-rich vegetables will improve the health of my family members and reduce the risk of IDDs

PBen2: Consuming iodine-rich cabbage will improve the health and school performance of my children

PBen3: I think that if one does not have good health, they will have nothing.

The farmer's perception of the advantages of applying iodine fertilizers

**Cues to action**

Cues1: Farmers in my community applying iodine fertilizers would make me use it as well

Cues2: The government recommending iodine fertilizers would make me apply it to my vegetable garden if the government

Cues3: Myself or a family member suffering from IDD would make me apply iodine fertilizers to my vegetable garden

Triggers that stimulate the farmer to apply iodine fertilizers

---

*Remark: The statements corresponding to the different construct items were adapted and modified from [1-6].*

Table S2: Predicting farmers' intention to adopt iodine agronomic biofortification

| Regression models                   | Constructs               | $\beta$ | Wald's $\chi^2$ | P (sig) | R <sup>2</sup> |
|-------------------------------------|--------------------------|---------|-----------------|---------|----------------|
| Model 1: TPB                        | Attitude                 | 0.800   | 23.739          | <.001   | 0.65           |
|                                     | Subjective norms         | -.270   | 2.585           | .108    |                |
|                                     | PBC                      | 0.90    | 67.491          | <.001   |                |
| Model 2: HBM.                       | Perceived severity       | -.200   | .719            | .396    | 0.09           |
|                                     | Perceived susceptibility | .120    | .370            | .543    |                |
|                                     | Perceived benefits       | .592    | 7.941           | .005    |                |
|                                     | Perceived barriers       | -.457   | 12.235          | <.001   |                |
|                                     | Cues to action           | -.086   | .214            | .644    |                |
| Model 3: TPB + H.B.M.               | Attitude                 | 0.750   | 29.404          | <.001   | 0.70           |
|                                     | Perceived severity       | -.029   | .022            | .882    |                |
|                                     | Subjective norms         | -.342   | 3.478           | .062    |                |
|                                     | Perceived susceptibility | -.412   | 1.319           | .251    |                |
|                                     | PBC                      | 0.900   | 67.887          | <.001   |                |
|                                     | Perceived benefits       | .399    | 1.266           | .261    |                |
|                                     | Perceived barriers       | -.341   | 2.403           | .121    |                |
|                                     | Cues to action           | -.531   | 2.874           | .090    |                |
| Model 4 :<br>Modifying<br>variables | Knowledge                | .212    | 2.977           | .084    | 0.14           |
|                                     | Gender                   | -.023   | .007            | .934    |                |
|                                     | Crop type (1)            | .630    | 4.979           | .026    |                |
|                                     | Farm size                | .101    | 4.858           | .028    |                |
|                                     | Access to extension      | .801    | 11.441          | <.001   |                |

## References

1. Abizari, A.R.; Pilime, N.; Armar-Klemesu, M.; Brouwer, I.D. Cowpeas in Northern Ghana and the Factors that Predict Caregivers' Intention to Give Them to Schoolchildren. *PLoS ONE* **2013**, *8*, 1-8. <https://doi.org/10.1371/journal.pone.0072087>.
2. Fanou-Fogny, N.; van Dam, B.; Koreissi, Y.; Dossa, R.A.; Brouwer, I.D. Factors predicting consumption of fonio grain (*Digitaria exilis*) among urban Malian women of reproductive age. *J Nutr Educ Behav* **2011**, *43*, 219-228. <https://doi.org/10.1016/j.jneb.2010.03.008>.
3. Icek, A. From Intentions to Actions: A Theory of Planned Behavior. *Action control* **1985**, 11-39.
4. Icek, A. The Theory of Planned Behavior. *Organizational Behavior and Human decision processes* **1991**, *50*, 179-121.
5. Jones, C.J.; Smith, H.; Llewellyn, C. Evaluating the effectiveness of health belief model interventions in improving adherence: a systematic review. *Health Psychology Review* **2014**, *8*, 253-269. <https://doi.org/10.1080/17437199.2013.802623>.
6. Sun, X.; Guo, Y.; Wang, S.; Sun, J. Predicting Iron-Fortified Soy Sauce Consumption Intention: Application of the Theory of Planned Behavior and Health Belief Model. *Journal of Nutrition Education and Behavior* **2006**, *38*, 276-285. <https://doi.org/10.1016/j.jneb.2006.04.144>.
